# Supplementary material for: Blending PLA with Polyesters Based on 2,5-Furan Dicarboxylic Acid: Evaluation of Physicochemical and Nanomechanical Properties
Source: MDPI journal article supplement (doi:10.3390/polym14214725), 2022-11-04
Supplement: s1 [file s1]

## Supplementary Materials

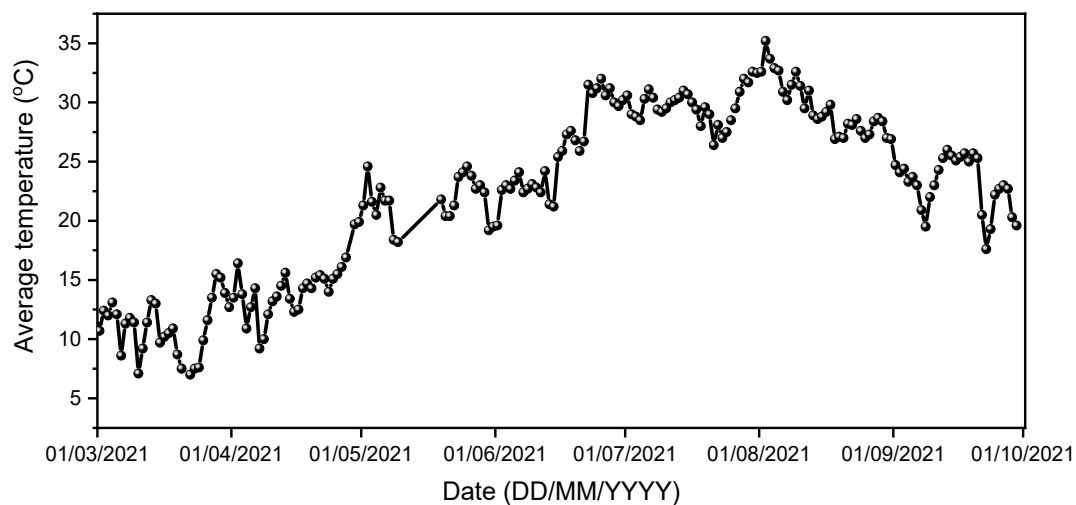

**Figure S1.** Average daily temperature in Thessaloniki, Greece, during soil degradation testing.

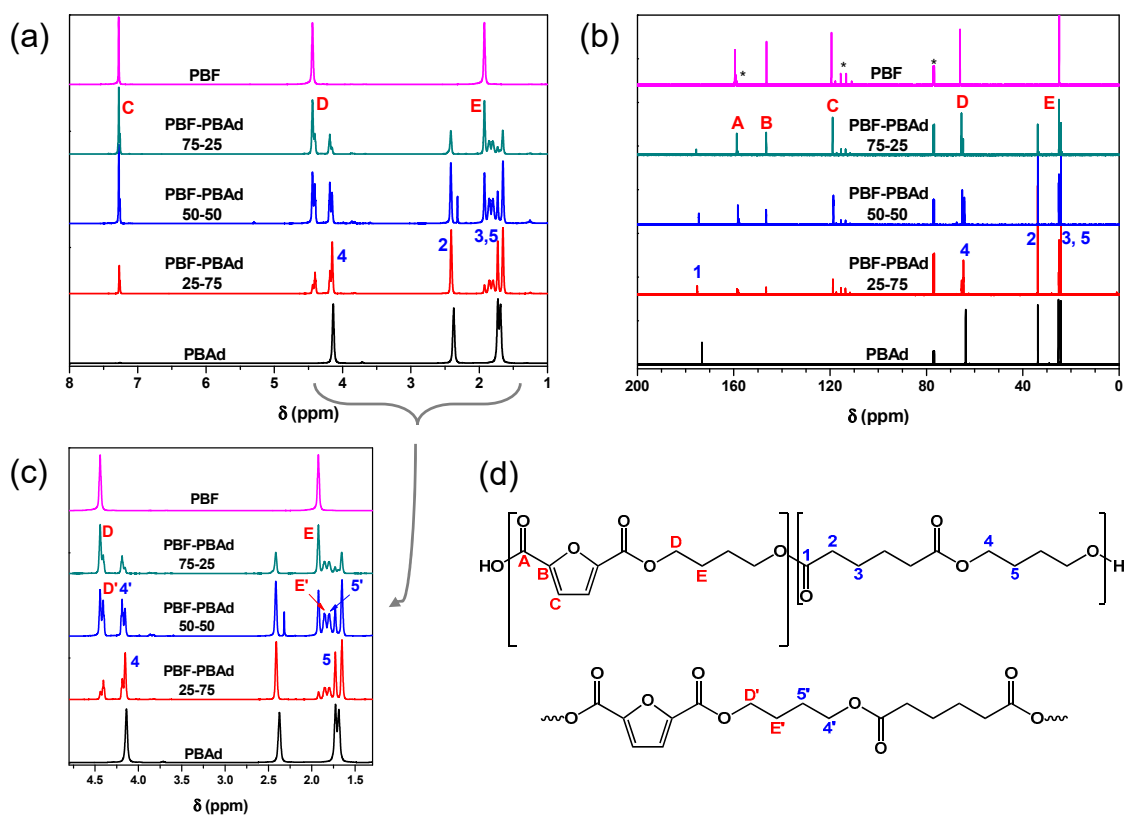

**Figure S2.** NMR spectra of the synthesized copolymers. (a)  $^1\text{H}$  NMR, (b)  $^{13}\text{C}$  NMR, (c)  $^1\text{H}$  NMR zoom in the 1.5 - 4.5 ppm region, (d) numbered structures of PBF-PBAd copolymers. The peaks with the asterisk are assigned to the deuterated solvent ( $\text{CDCl}_3$  and  $\text{TFA-d}_1$ ).

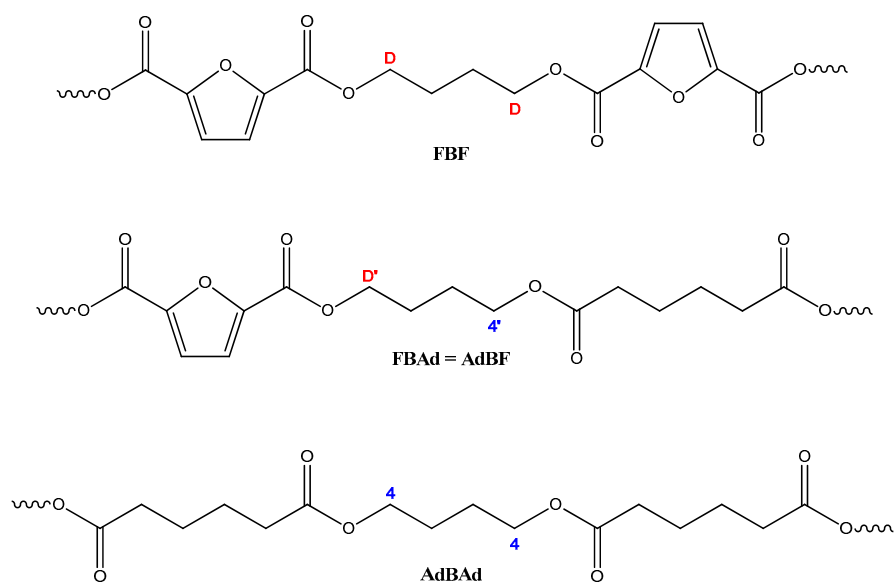

Figure S3. Possible triads of PBF-PBAd copolymers.

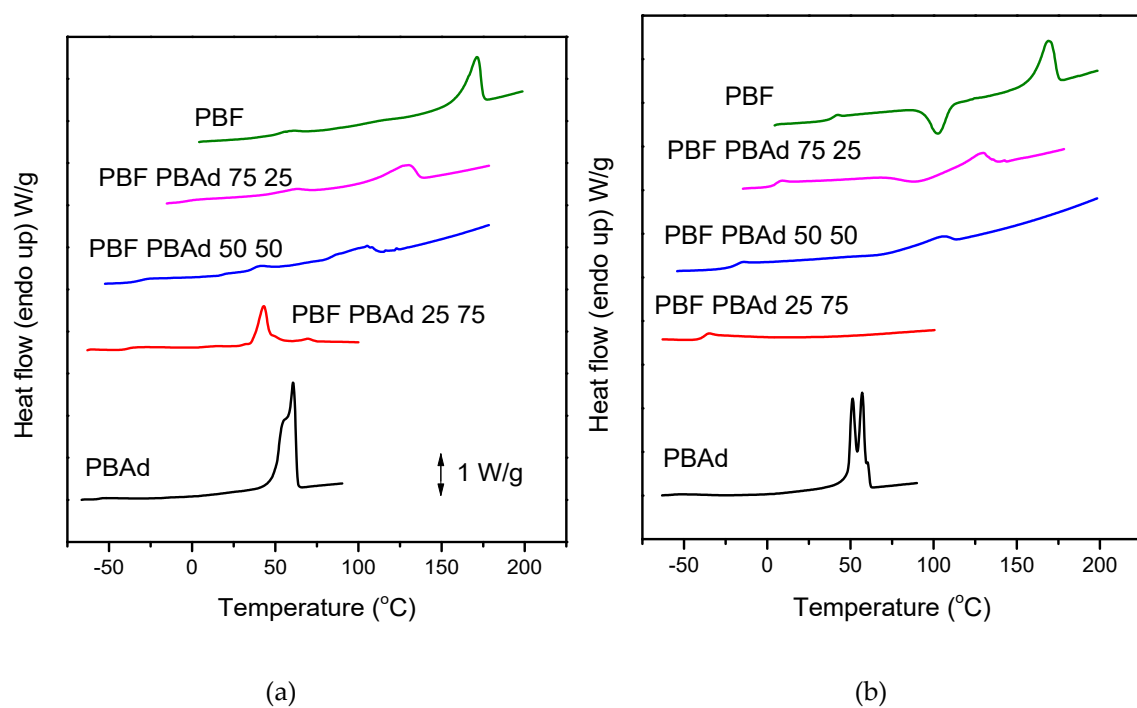

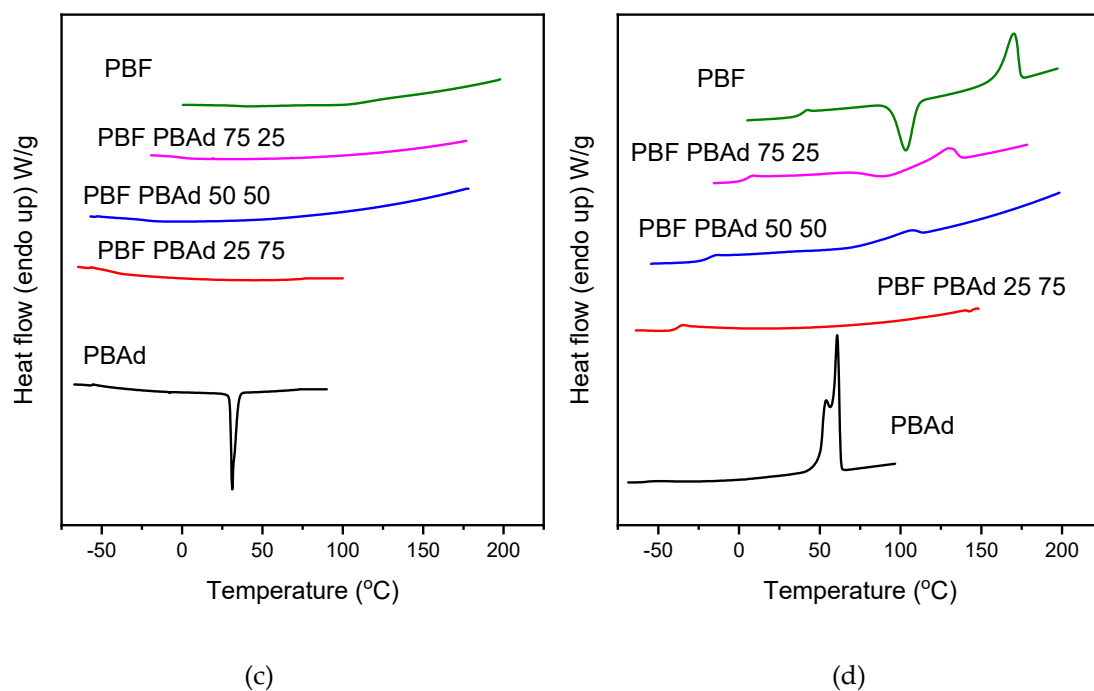

**Figure S4.** DSC scans of the homopolymers and copolymers during (a) 1<sup>st</sup> heating with rate 20 °C/min, (b) 2<sup>nd</sup> heating with rate 20 °C/min, (c) cooling with rate 10 °C/min and (d) heating after quenching with rate 20 °C/min.

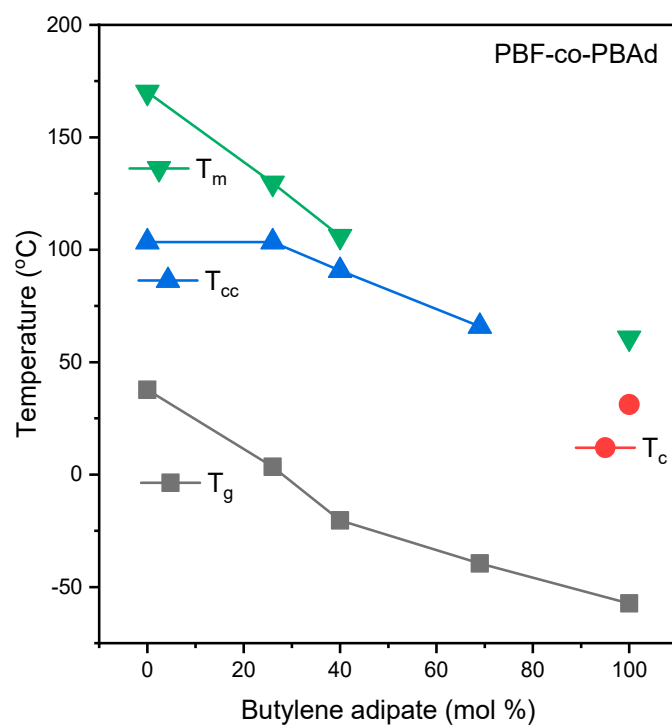

**Figure S5.** Thermal characteristics of the homopolymers PBF, PBAd and their copolymers.

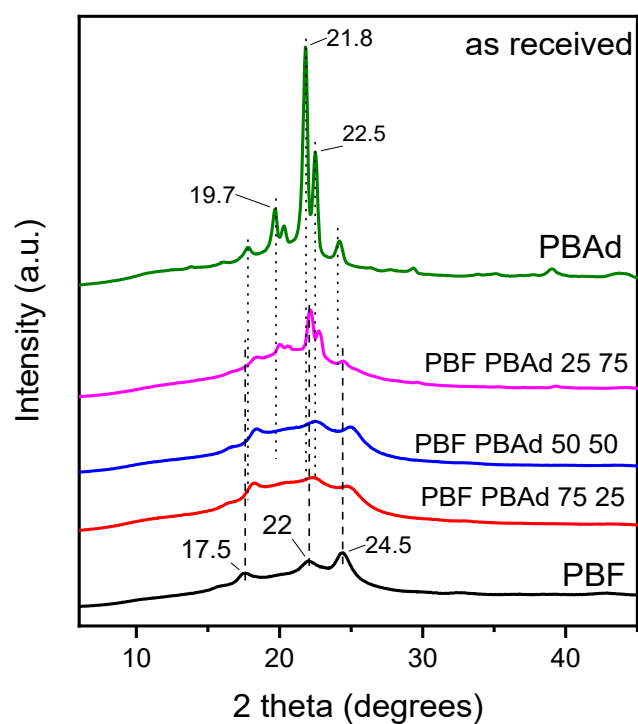

**Figure S6.** XRD patterns of PBF, PBAd and their copolymers.

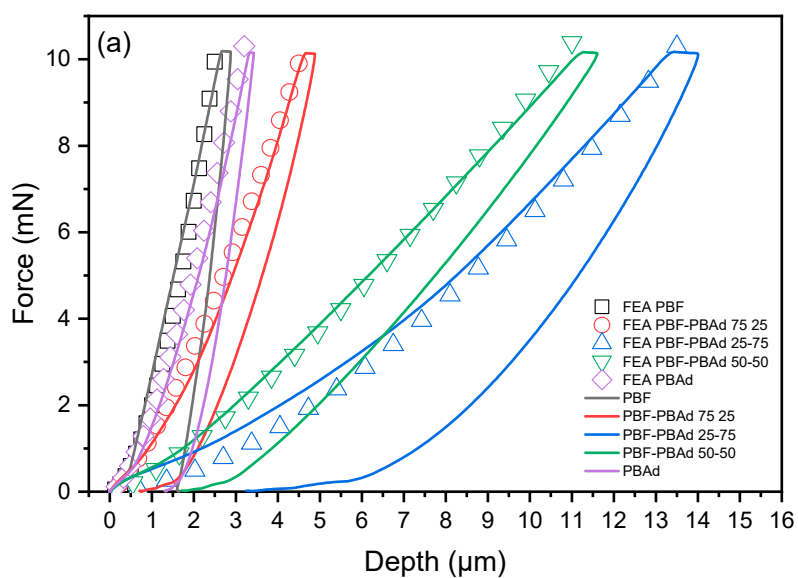

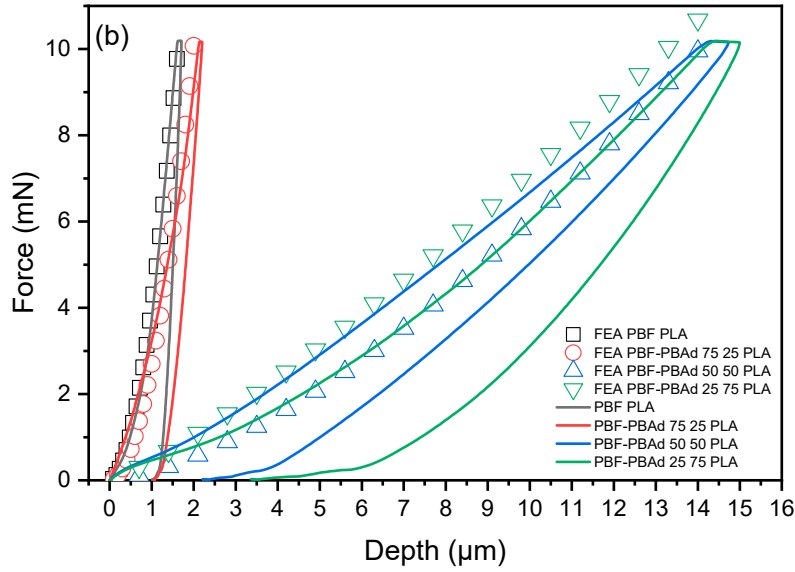

**Figure S7.** Load–depth nanoindentation curves of the PBF, PLA, PBF-PBAAd and PBF-PBAAd PLA specimens along with the curve-fitted FEA response.

**Table S1.** Thermal characteristics of PLA and its blends during heating after quenching, measured by DSC.

| Sample              | $T_g$       | $T_m$        | $\Delta H_m$ | $T_{cc}$    | $\Delta H_{cc}$ |
|---------------------|-------------|--------------|--------------|-------------|-----------------|
|                     | °C          | °C           | J/g          | J/g         | J/g             |
| PBF PLA             | 38.2, 62.8  | 157.5, 170.8 | 16.6         | 97.4, 136.2 | -9.5            |
| PBF-PBAAd 75 25 PLA | 4.2, 61.6   | 157.5        | 11.2         | 127.5       | -10             |
| PBF-PBAAd 50 50 PLA | -22.6, 58.6 | 153.8        | 7.1          | 131.1       | -11.3           |
| PBF-PBAAd 25 75 PLA | -35.6, 60.5 | 167.3        | 9.6          | 131.0       | -9.0            |
| PLA                 | 62.6        | 153.3        | 0.5          | 126.5       | -0.5            |

$T_g$ : glass transition temperature,  $T_m$ : melting point,  $\Delta H_m$ : melting enthalpy,  $T_{cc}$ : cold crystallization temperature,  $\Delta H_{cc}$ : cold crystallization enthalpy,  $T_c$ : melt crystallization temperature,  $\Delta H_c$ : melt crystallization enthalpy.

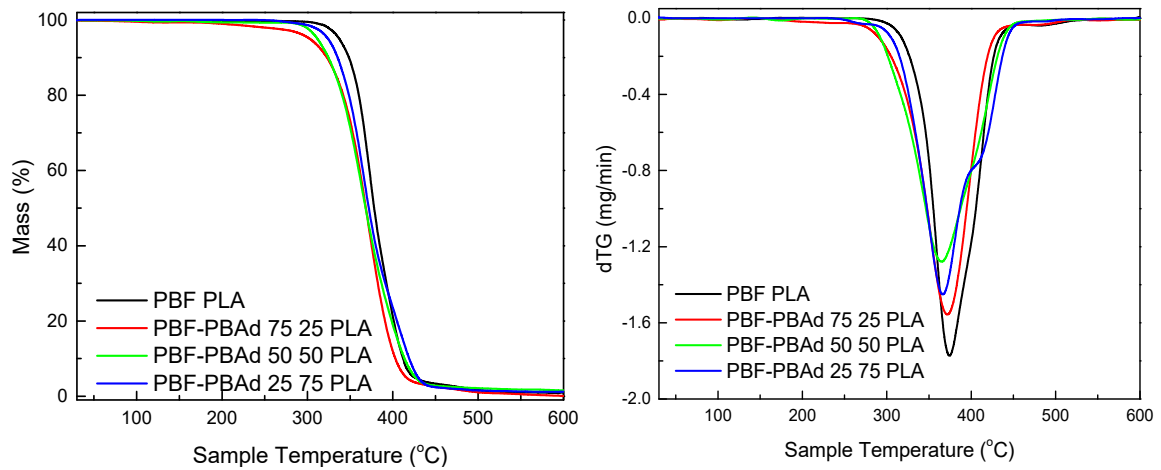

**Figure S8.** (a) TGA and (b) DTG curves of the PLA-based blends.

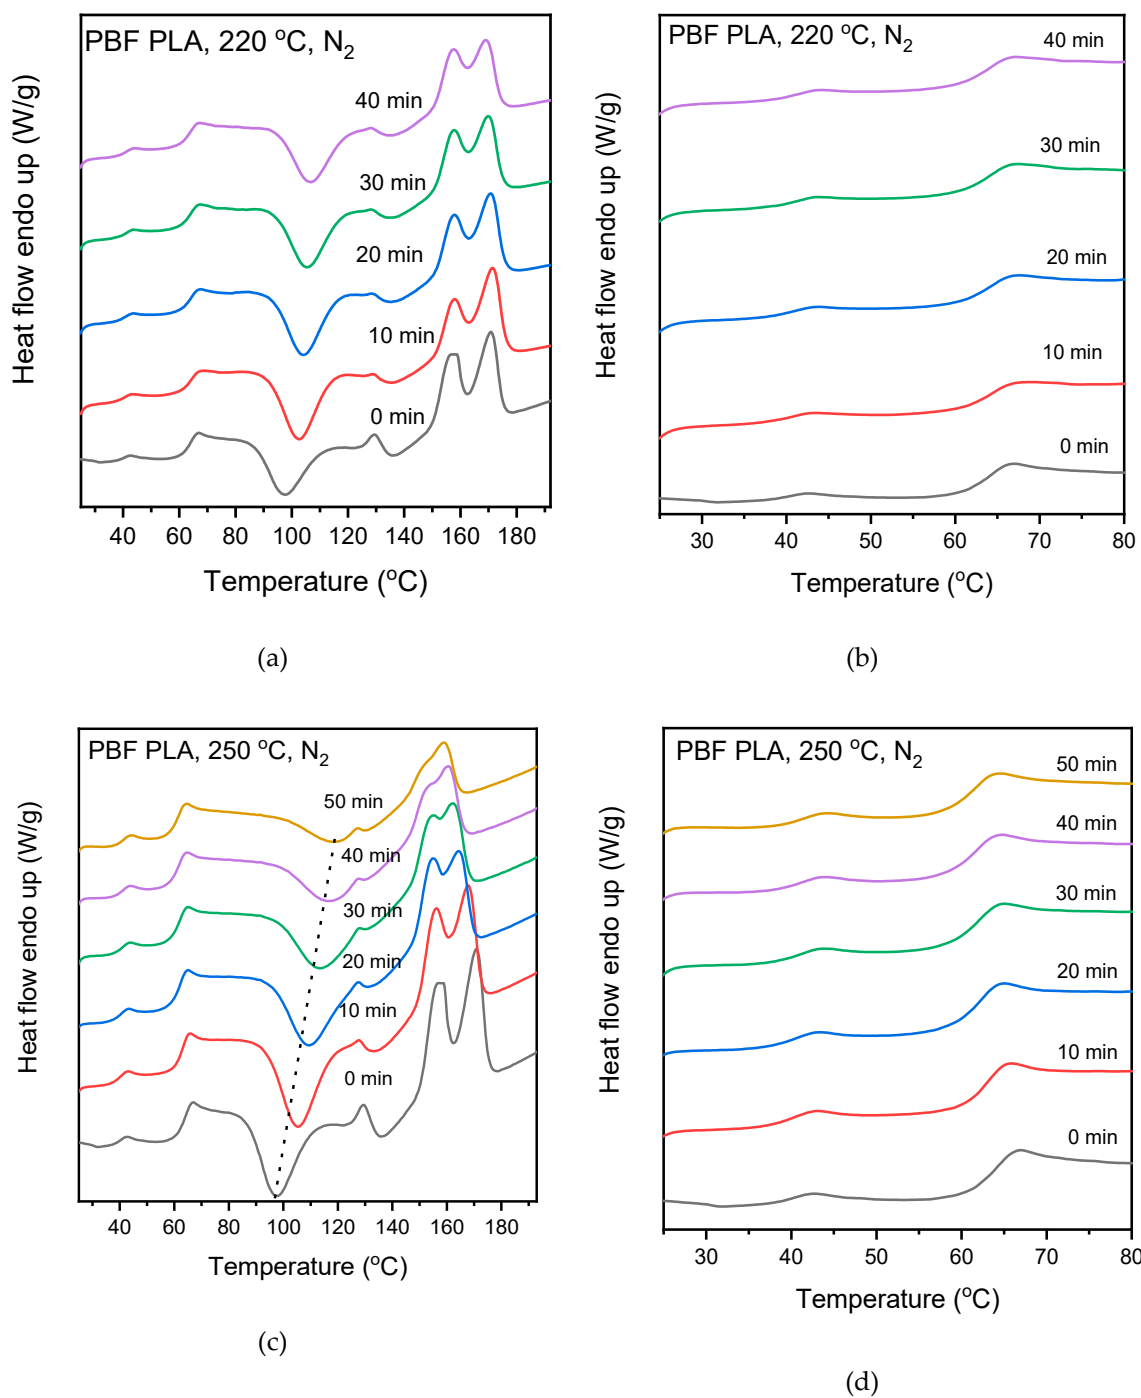

**Figure S9.** Study of reactive blending with DSC: heating curves after different times, zoom in the T<sub>g</sub> region of PBF PLA at 220 °C (a-b) and (c-d) 250 °C.

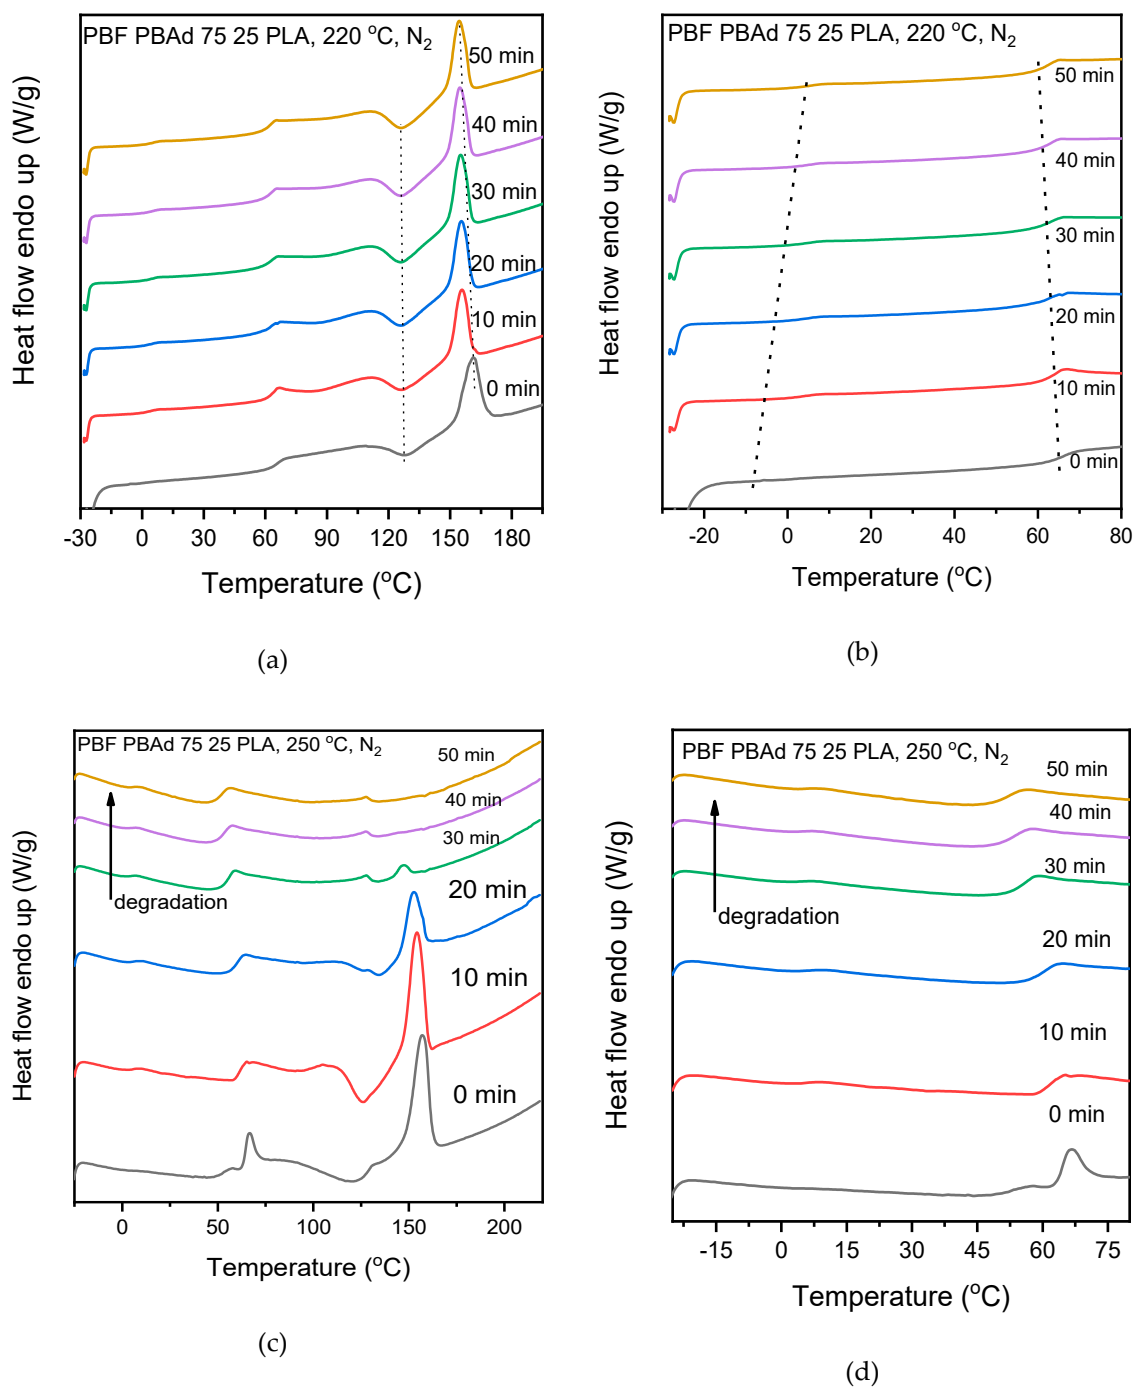

**Figure S10.** Study of reactive blending with DSC: heating curves after different times, zoom in the T<sub>g</sub> region of PBF-PBAd 75/25 PLA at 220 °C (a-b) and (c-d) 250 °C.

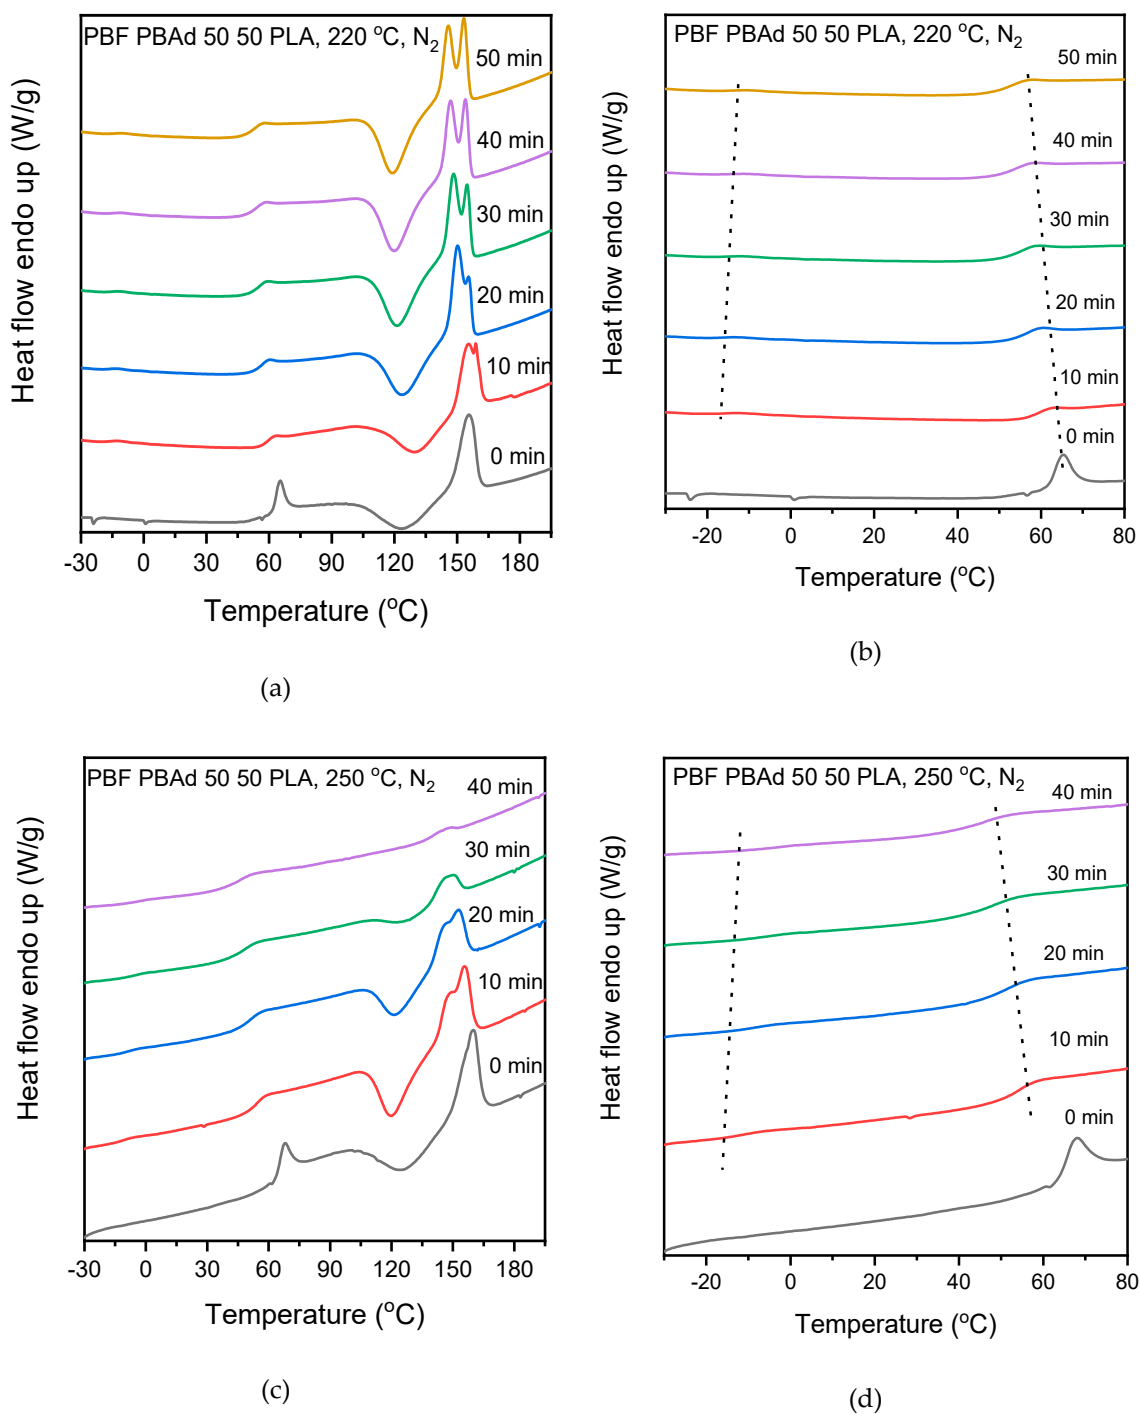

**Figure S11.** Study of reactive blending with DSC: heating curves after different times, zoom in the  $T_g$  region of PBF-PBAd 50/50 PLA at 220 °C (a-b) and (c-d) 250 °C.



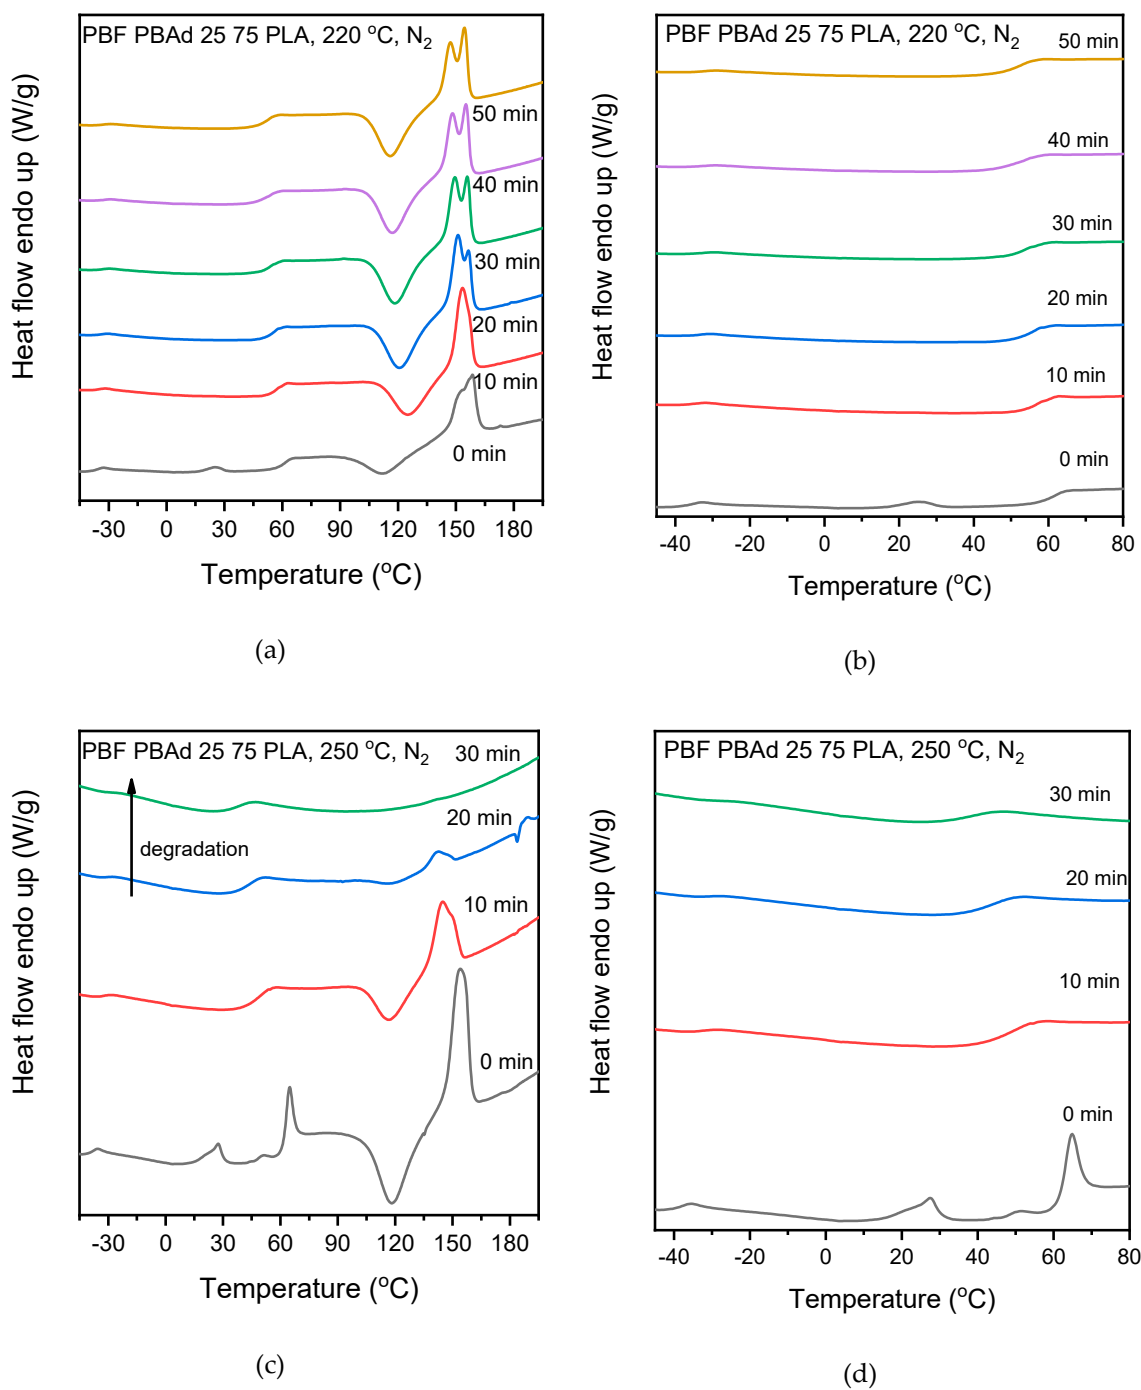

**Figure S12.** Study of reactive blending with DSC: heating curves after different times, zoom in the T<sub>g</sub> region of PBF-PBAd 25 75 PLA at 220 °C (a-b) and (c-d) 250 °C.

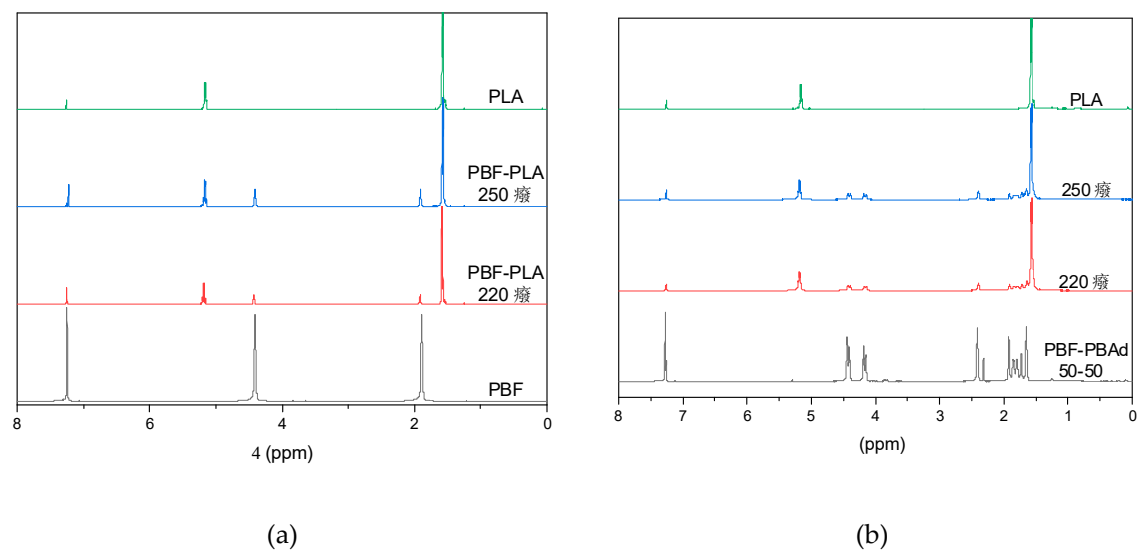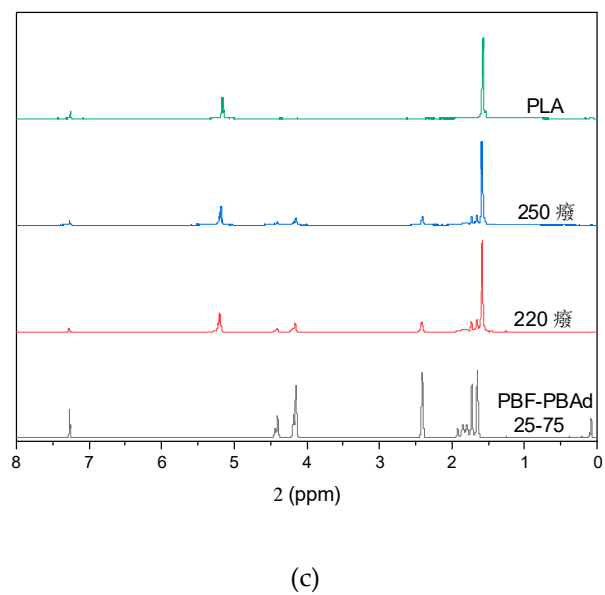

**Figure S13.**  $^1\text{H}$  NMR spectra of (a) PBF PLA, (b) PBF-PBAd 50-50 PLA, (c) PBF-PBAd 25-75 PLA blends, at 220  $^{\circ}\text{C}$  and 250  $^{\circ}\text{C}$ .
